# Supplementary material for: Characterization of Natural Therapeutic Compounds Producing Novel Bacterial Strains isolated from Hyderabad, India
Source: Research Square preprint supplement (doi:10.21203/rs.3.rs-4912929/v2), 2025-04-29
Supplement: Supplementary file 1 [file 3ef78e4d2a58b15fe7a8037b.docx]

**Supplementary Material 1**

**Biochemical Studies**

| **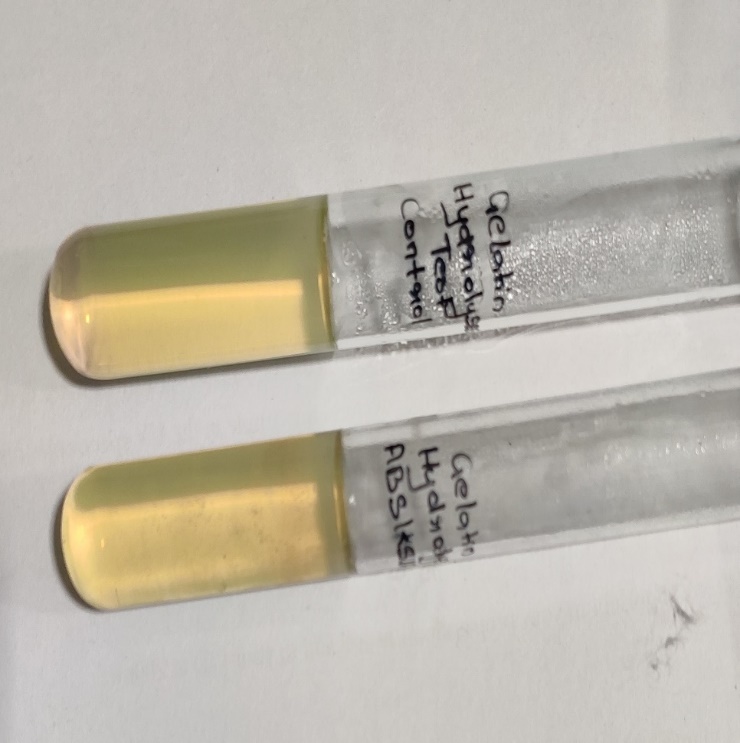** | **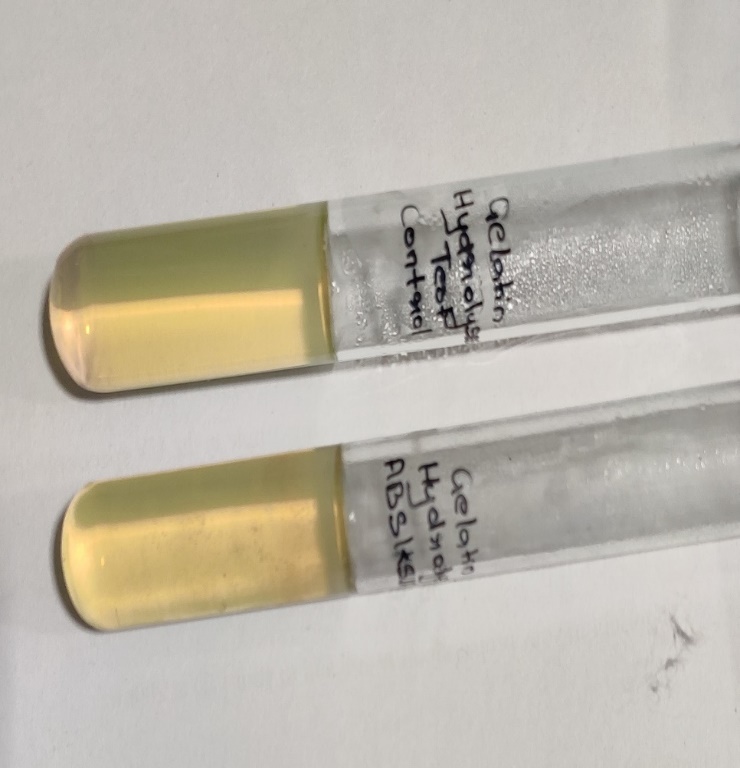** |
| --- | --- |
| **Fig. S1: Gelatin Hydrolyzation Test** | **Fig. S2: Indole Test** |
|  |  |
|  |  |
| **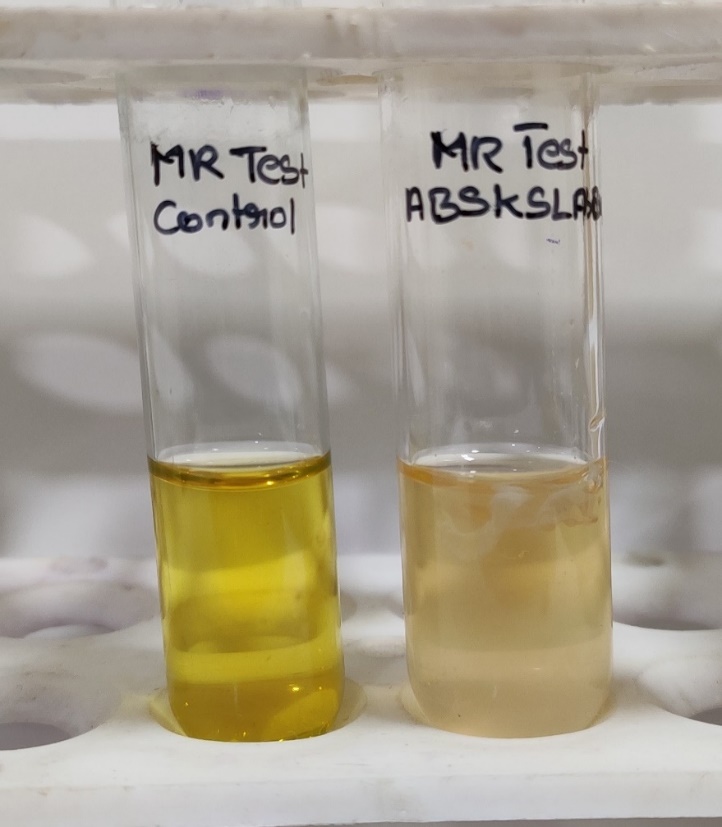** | **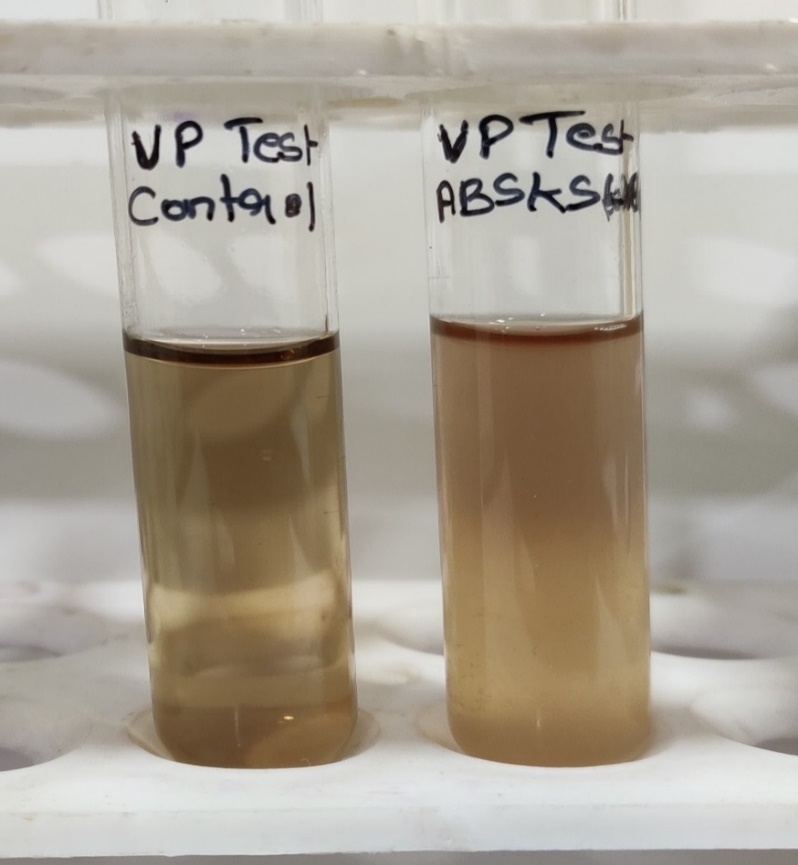** |
| **Fig. S3: Methyl-Red Test** | **Fig. S4: Voges Proskauer Test** |
| **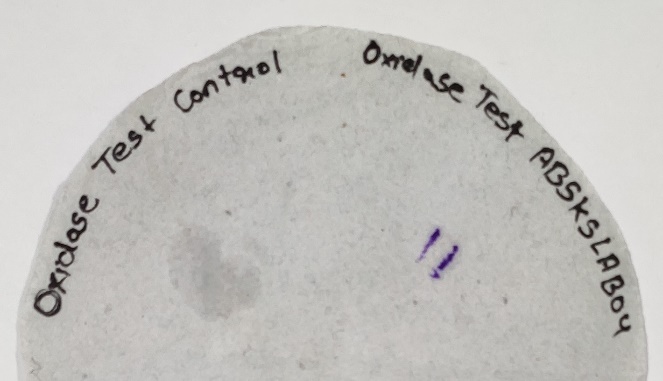** | **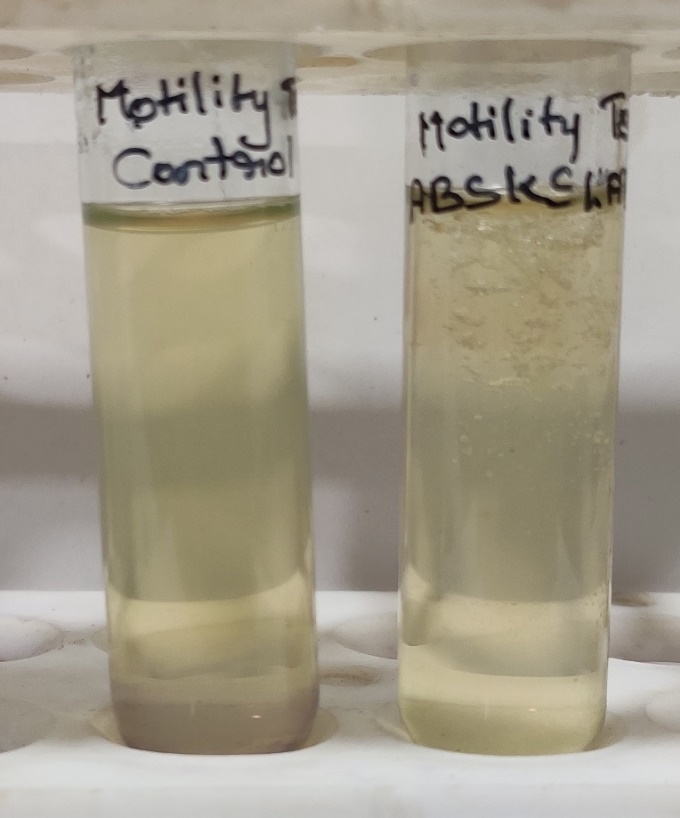** |
| **Fig. S5: Oxidase Test** | **Fig. S7: Motility Test** |
|  |  |
|  |  |
| **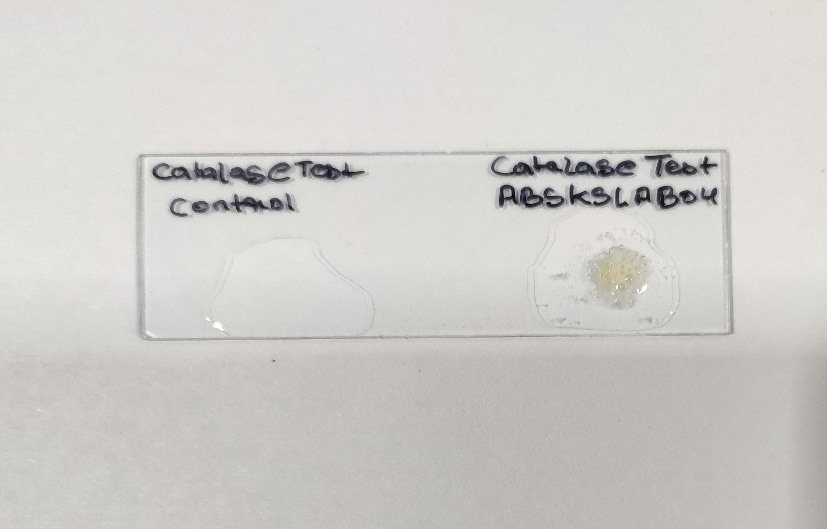** | |
| **Fig. S6: Catalase Test** | |
|  | |
|  | |
| **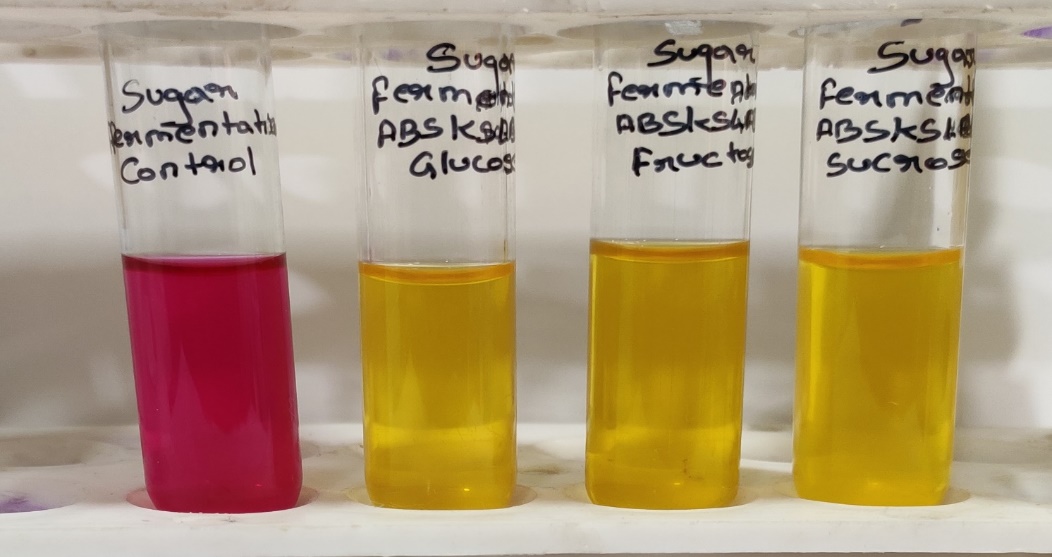** | |
| **Fig. S8: Sugar Fermentation Test** | |
|  | |
| **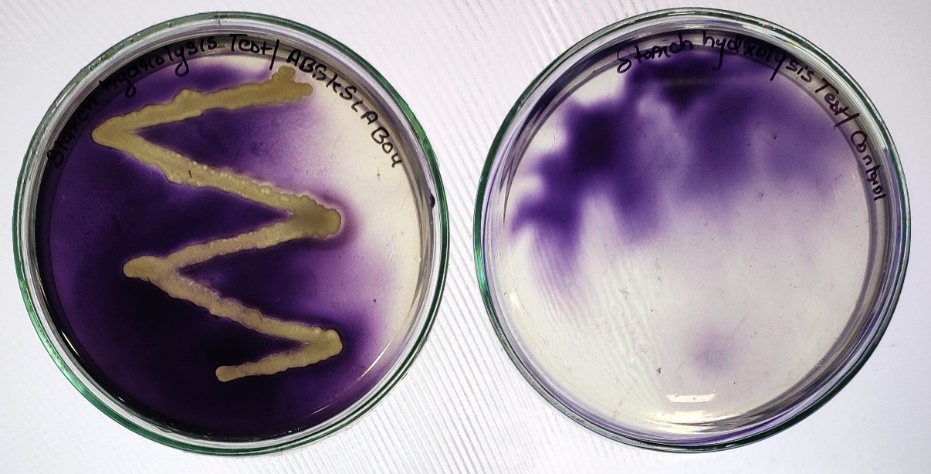** | |
| **Fig. S9: Starch Hydrolysis Test** | |

**Screening tests for antagonistic activity**

| 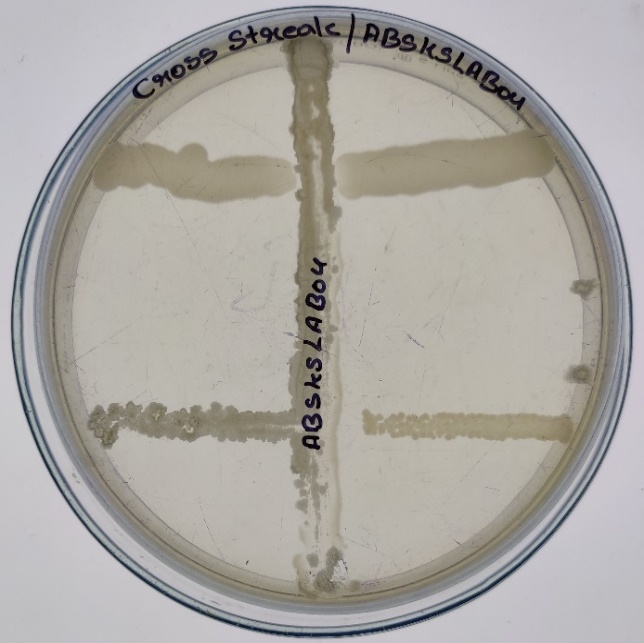**A)** | 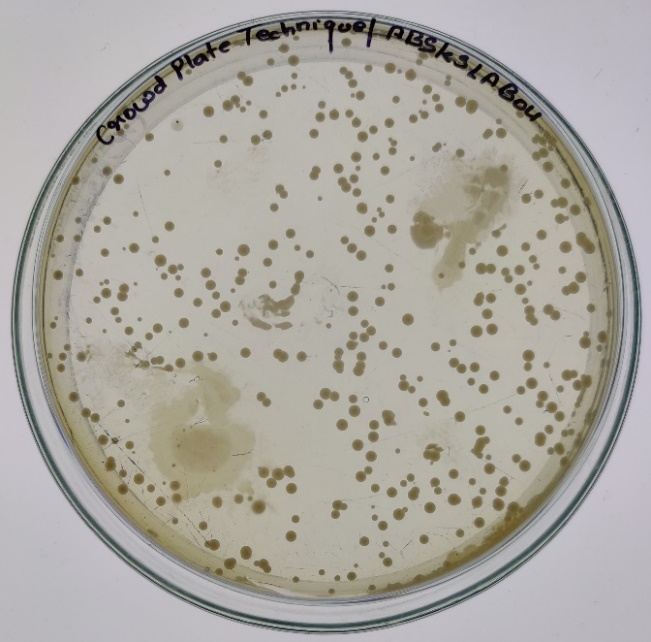**B)** |
| --- | --- |
| 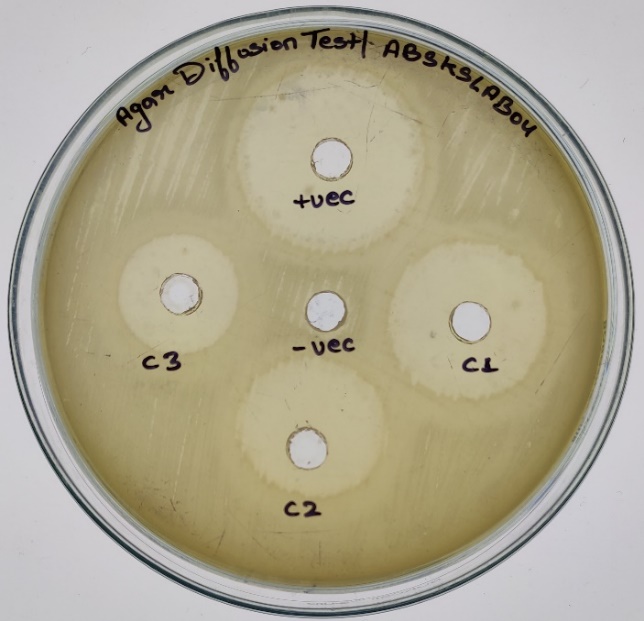**C)** | 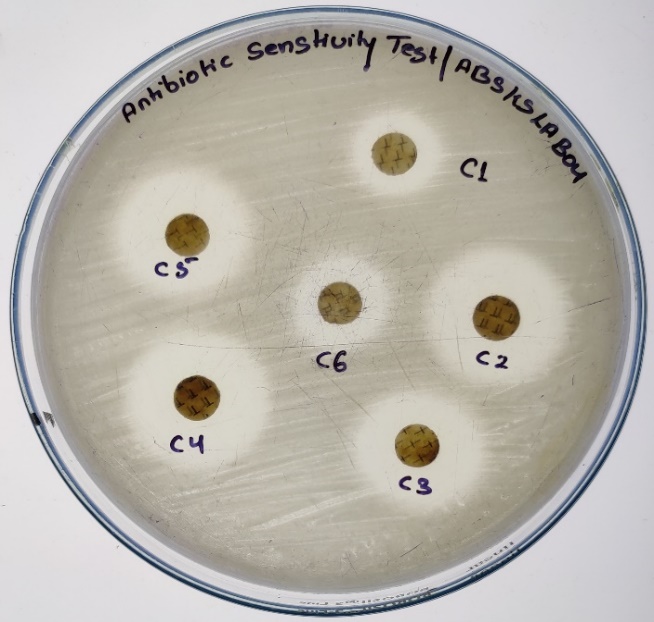 **D)** |

**Fig. S10: Antagonistic behaviour of *Streptomyces peucetius*; A: Cross- streaking (transverse streaking), B: Seed overlay assay, C: Agar diffusion assay, and D: Antibiotic sensitivity assay.**
