# Supplementary material for: Characterization of Natural Therapeutic Compounds Producing Novel Bacterial Strains isolated from Hyderabad, India
Source: Research Square preprint supplement (doi:10.21203/rs.3.rs-4912929/v2), 2025-04-29
Supplement: Supplementary file 2 [file ca98738510c5c898574db6c9.docx]

**Supplementary Material 3**

**Plackett Burman Experimental Design**

**
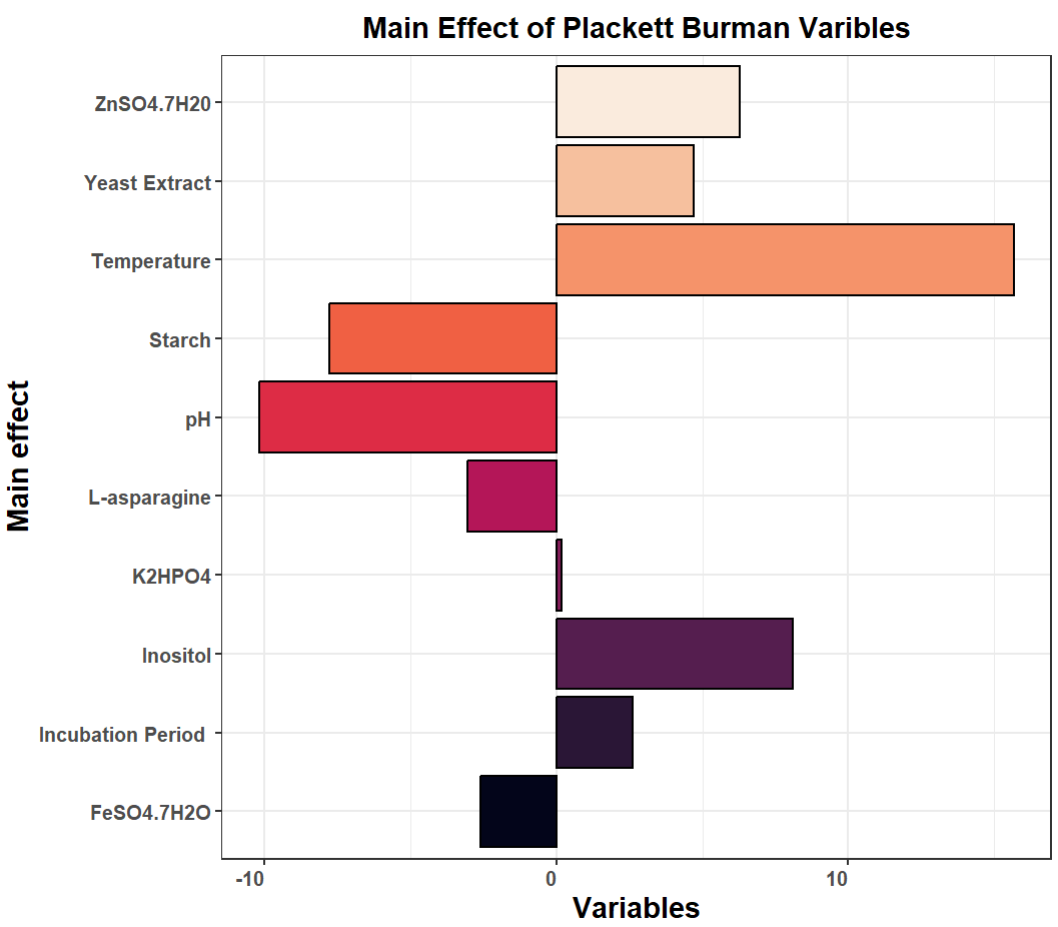
**

**Fig. S1: Pareto Chart for Coefficient Main Effects of Plackett Burman Design**

**
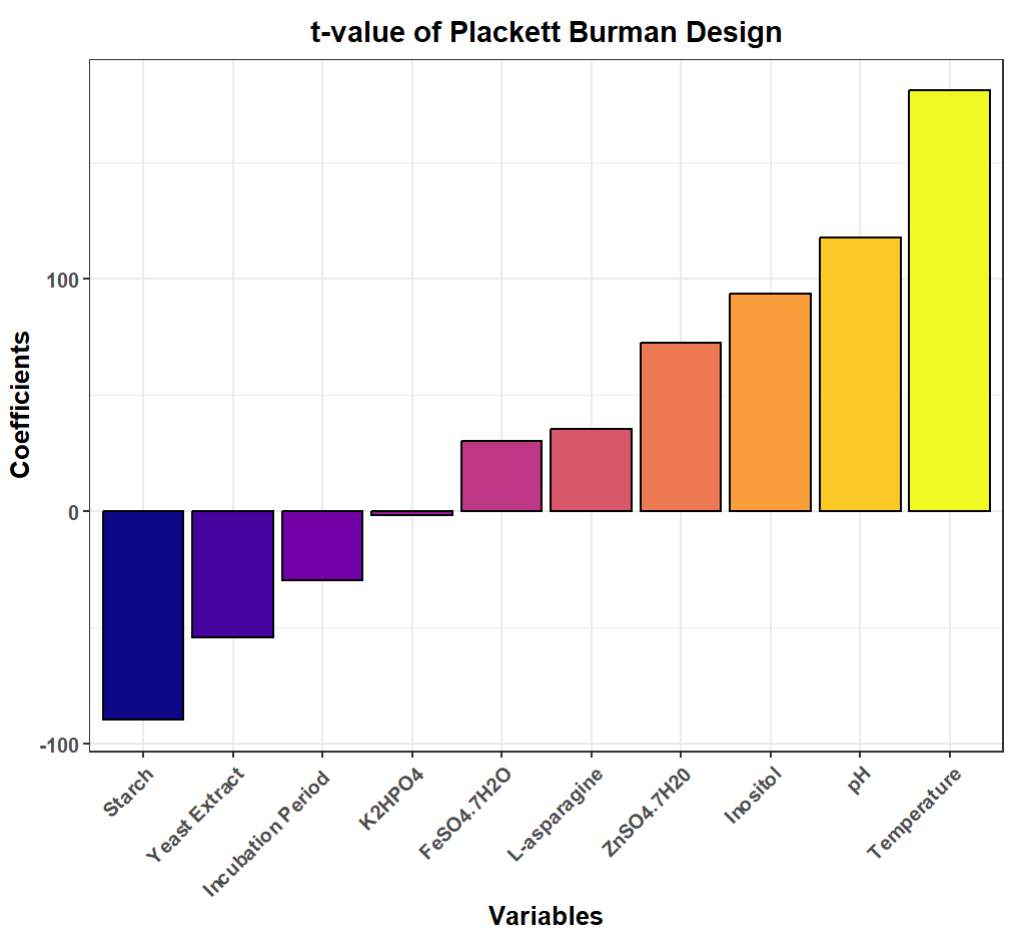
**

**Fig. S2: t-value plot for Plackett Burman Design**

**
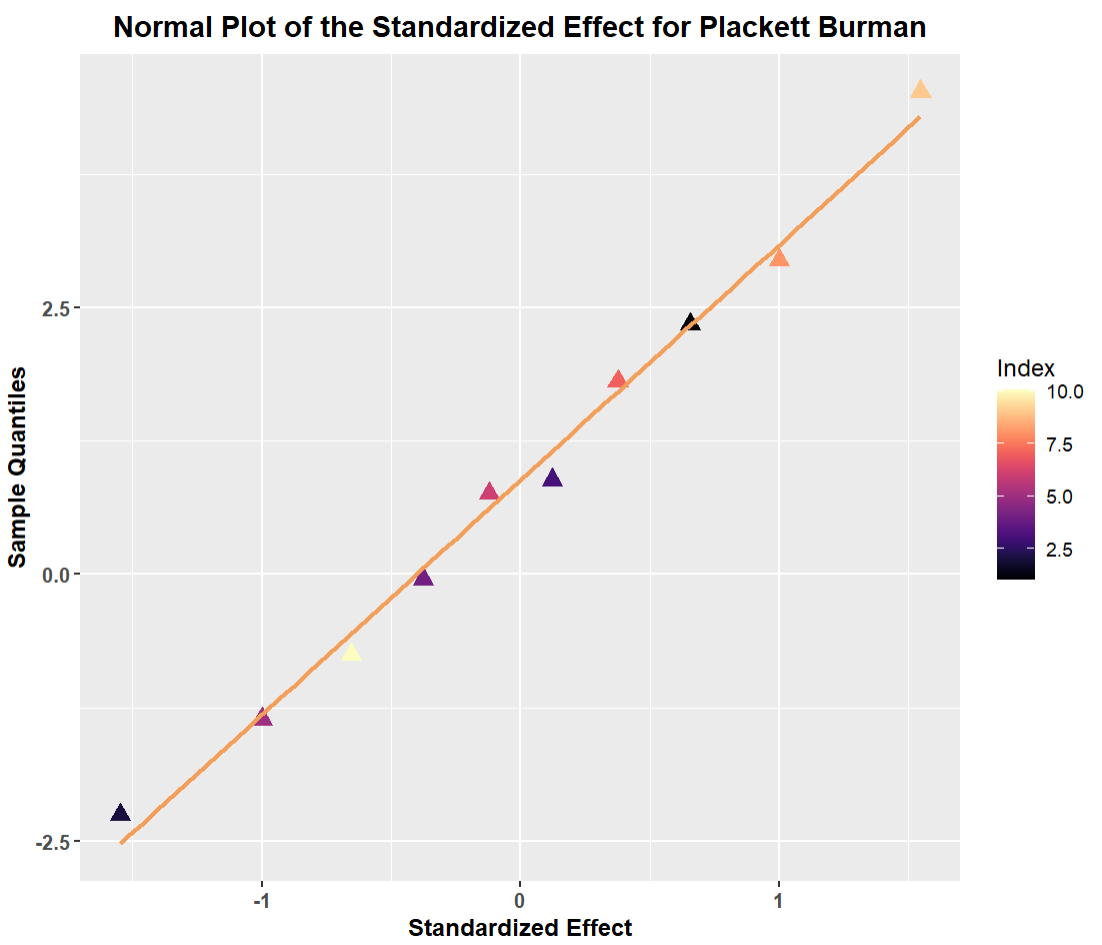
**

**Fig. S3: Normal Plot of Standardized Effect for Plackett Burman Design**

**Box ‒ Behnken Experimental Design**

**
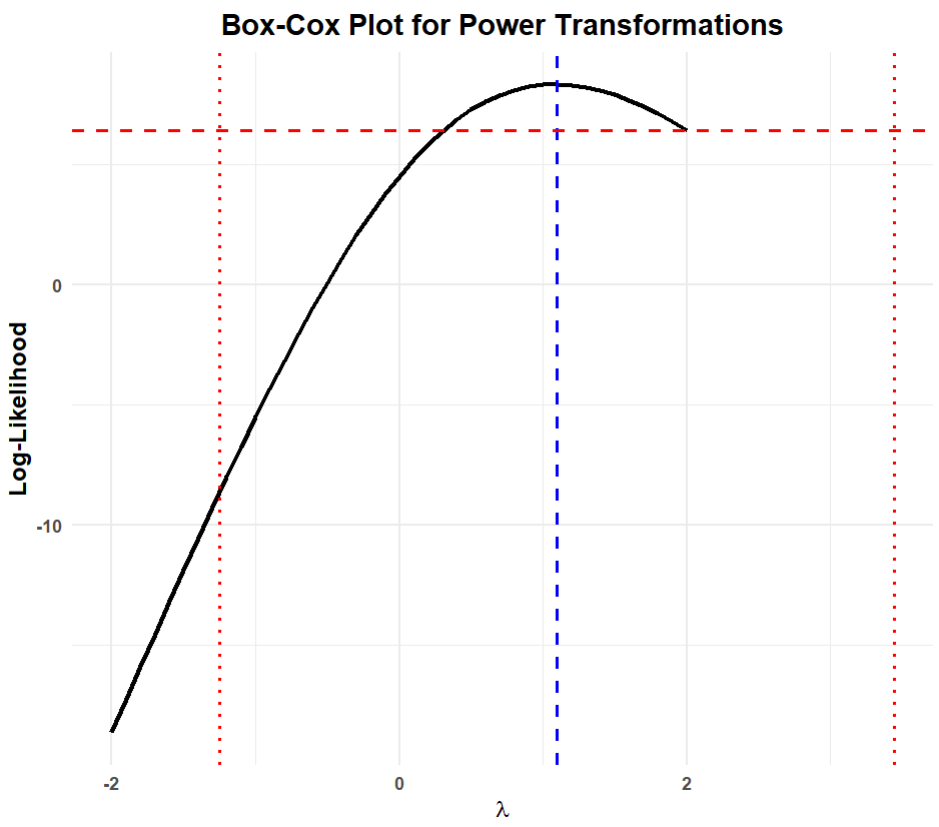
**

**Fig. S4: Box-cox plot for power transform for RSM-BBD**

**
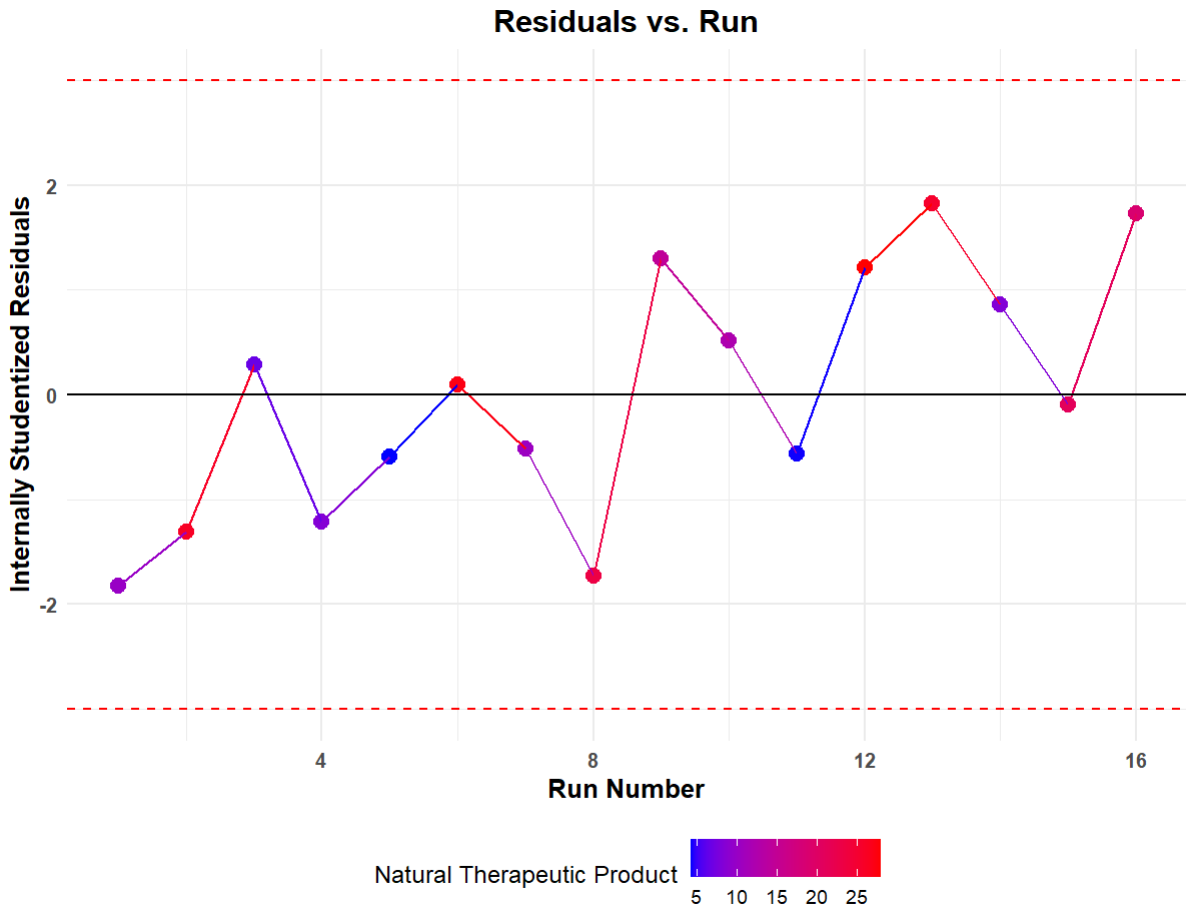
**

**Fig. S5: Residuals v/s Run Plot for RSM-BBD**

**
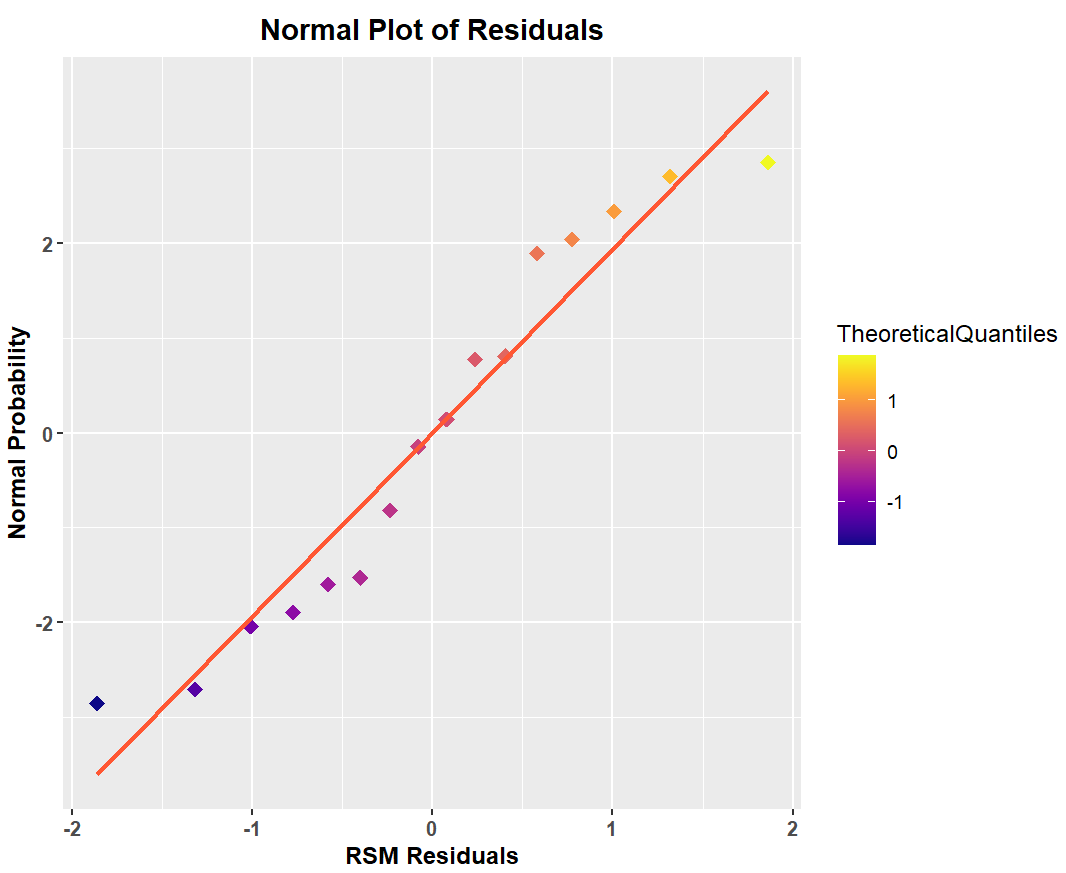
**

**Fig. S6: Normal Plot of Residuals for RSM-BBD**

**
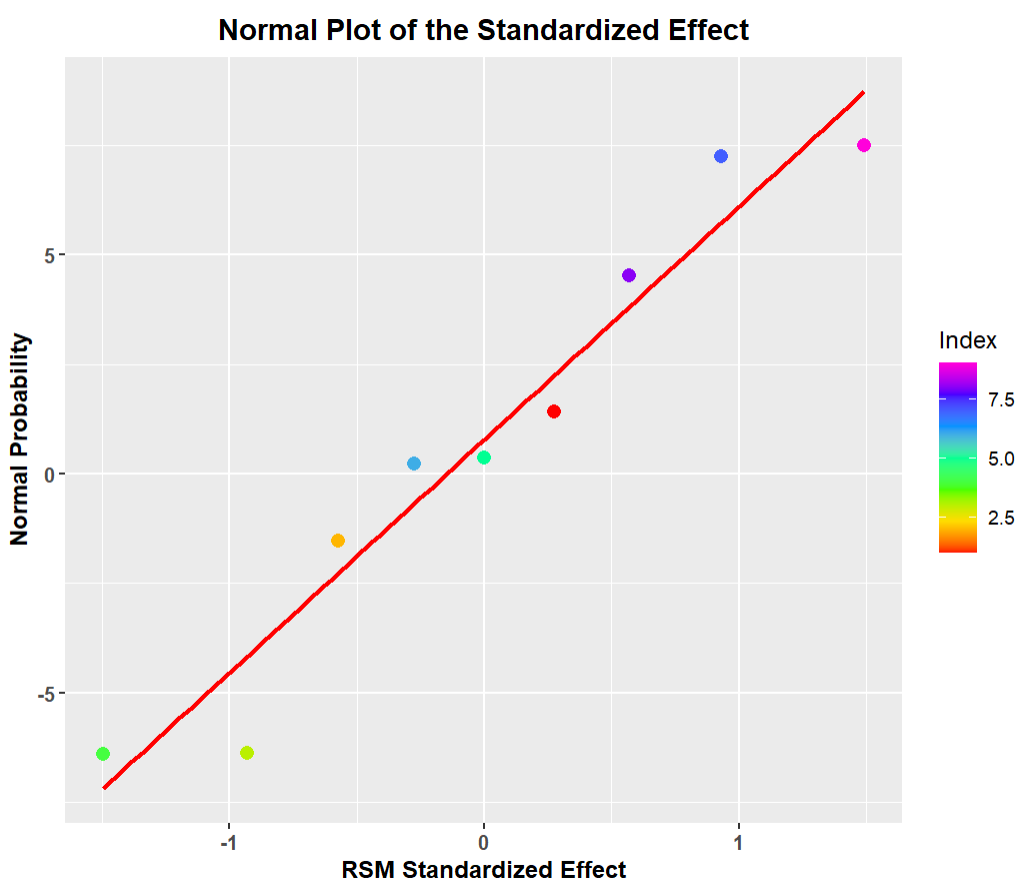
**

**Fig. S7: Normal Plot of Standardised Effect for RSM-BBD**

**
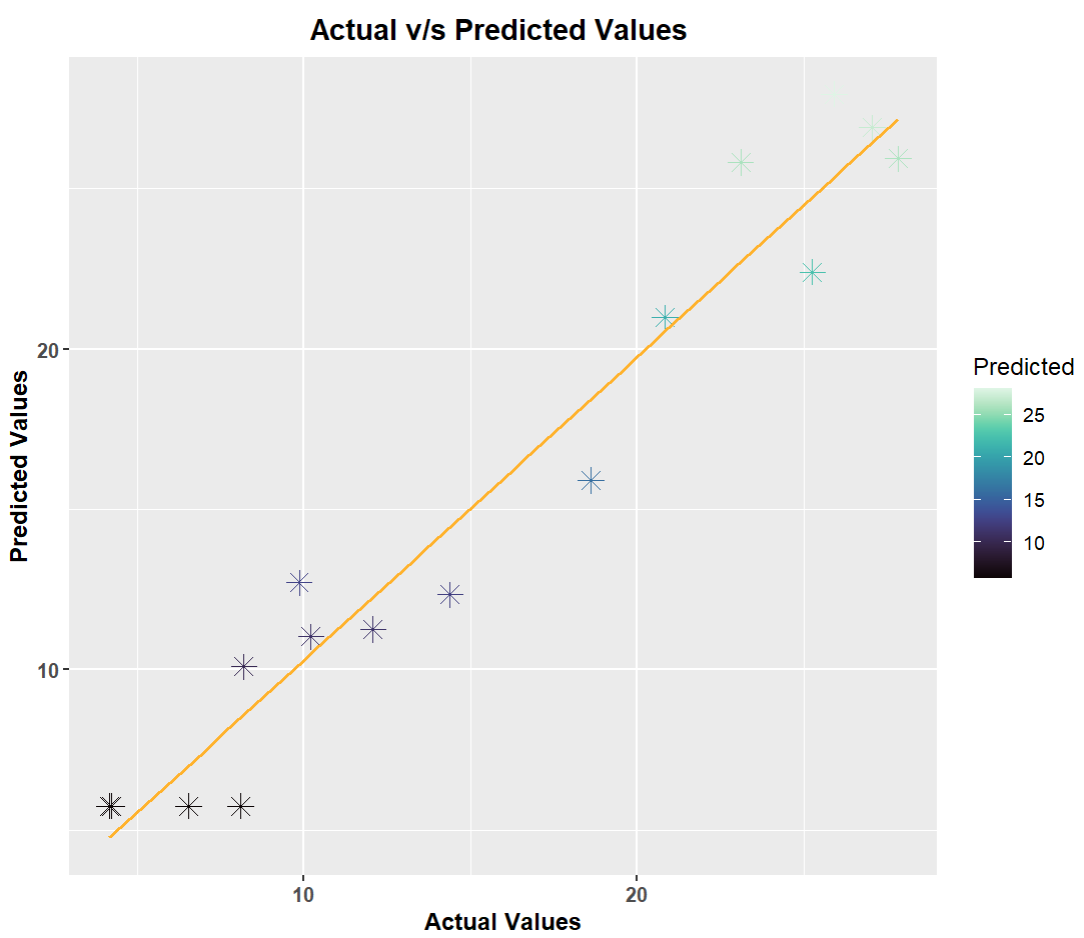
**

**Fig. S8: Predicted v/s Actual Values for RSM-BBD**

**Artificial Neural Network Design**


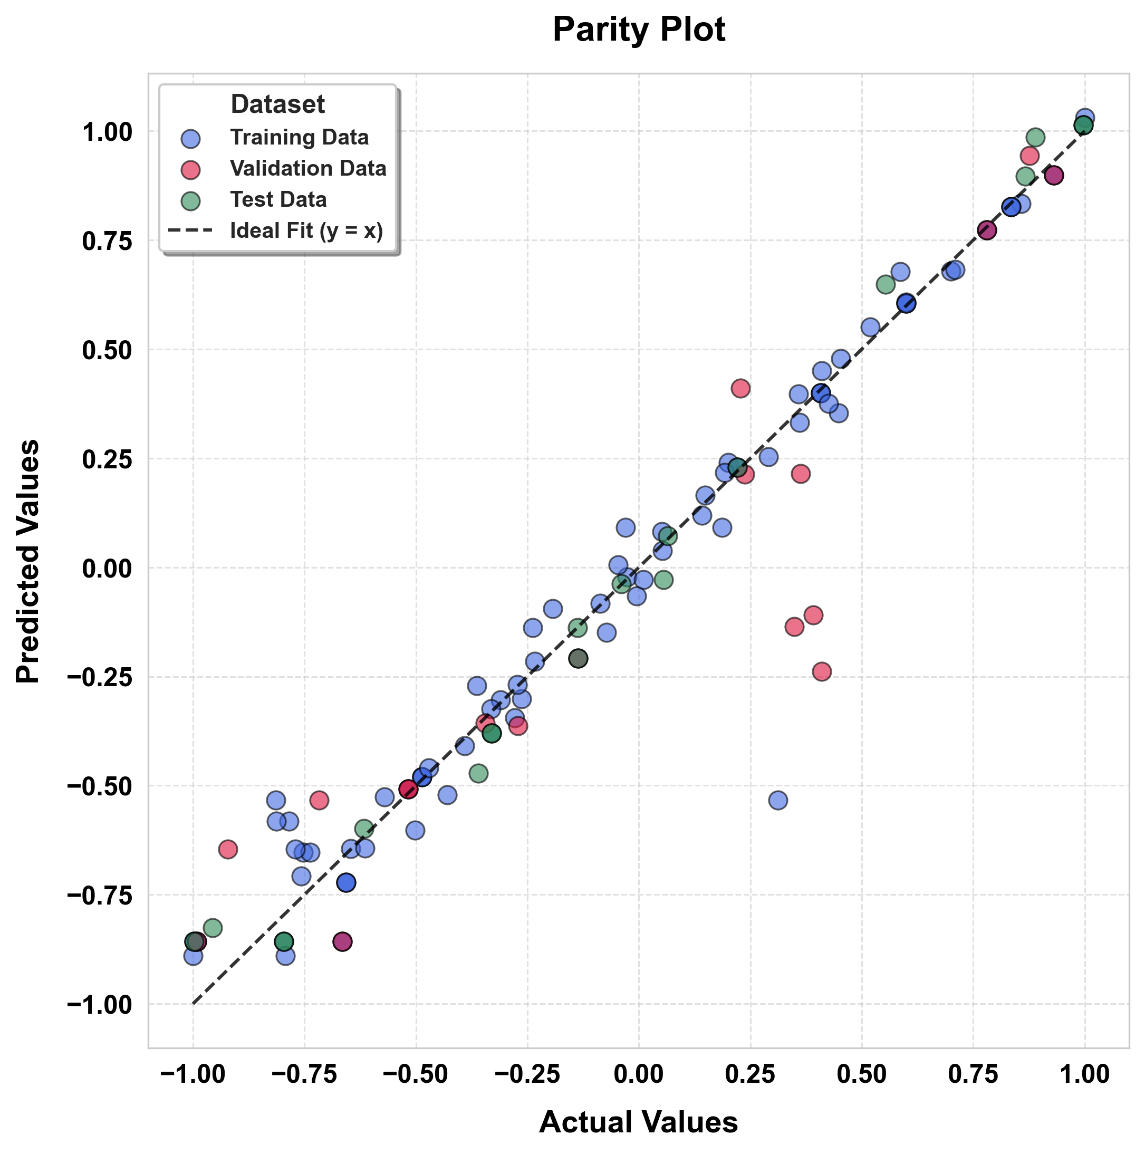


**Fig. S9: Parity Plot for ANN model**


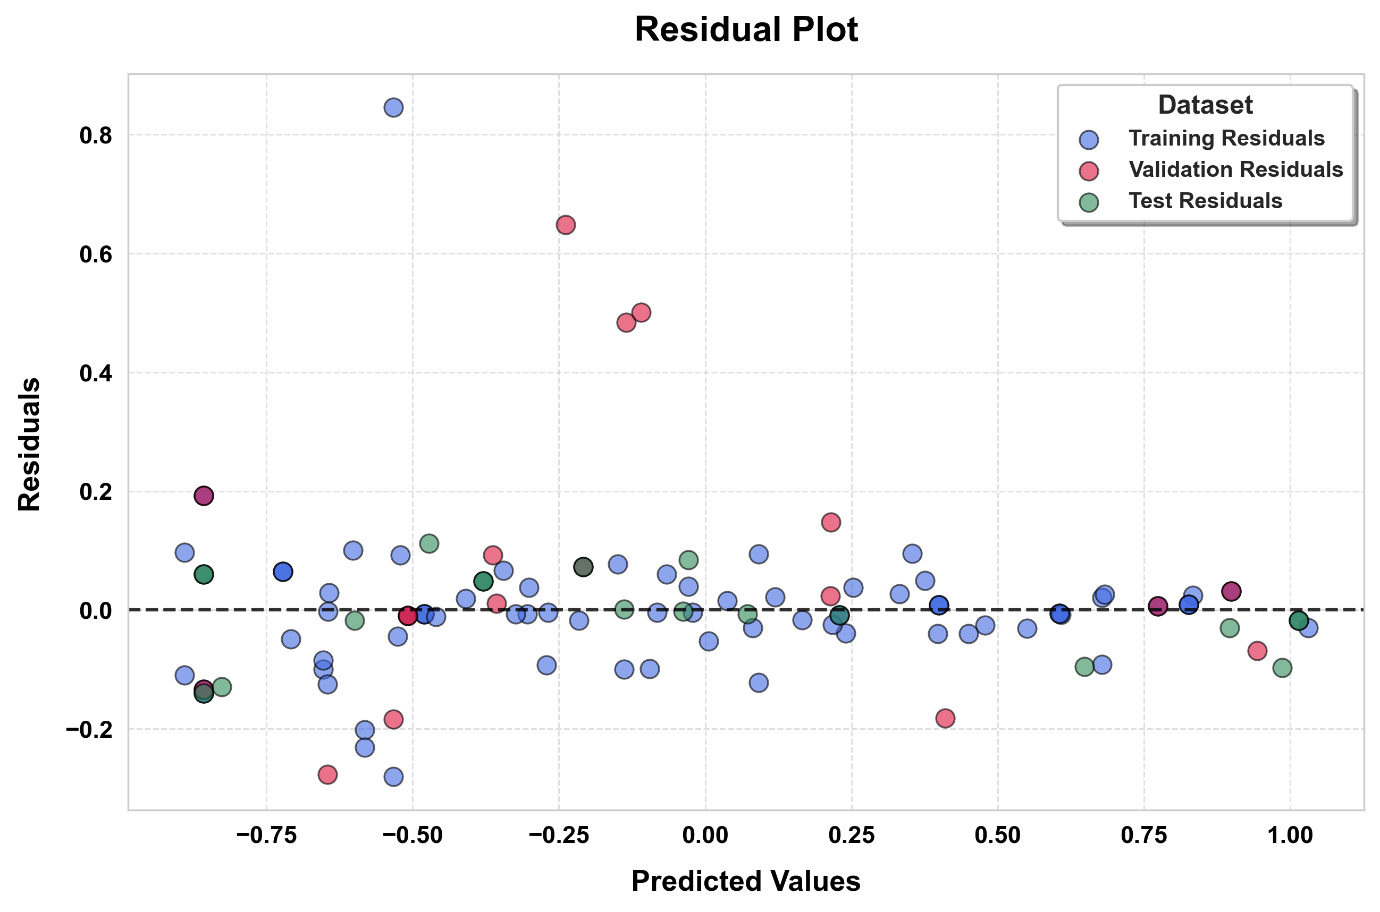


**Fig. S10: Residual Plot for ANN model**


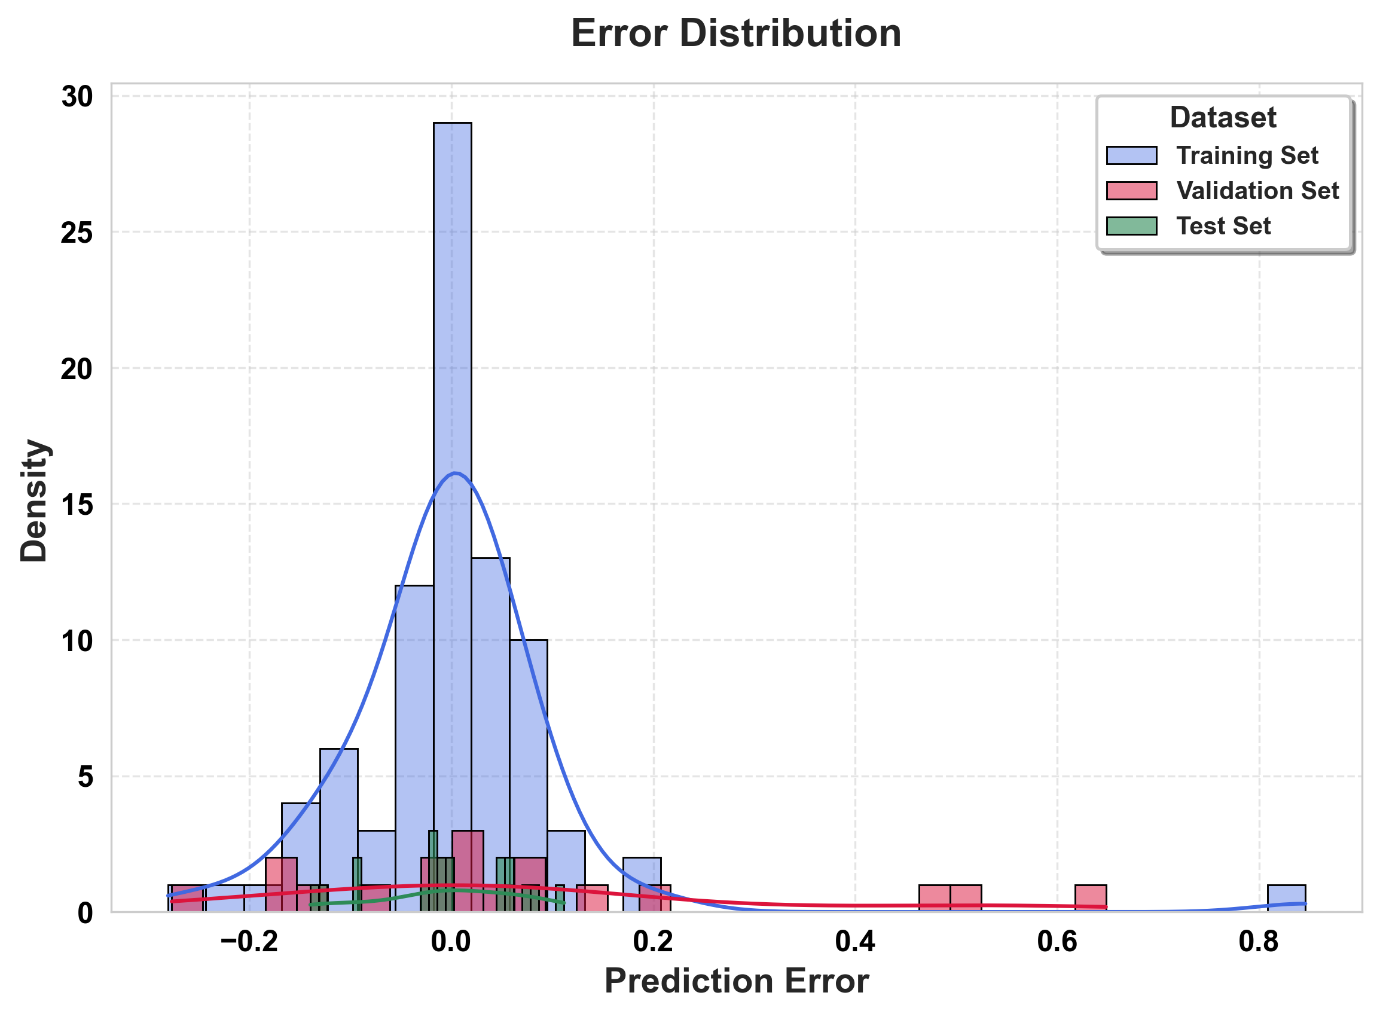


**Fig. S11: Error Histogram Plot for ANN model**

**Validation of the ANN model**


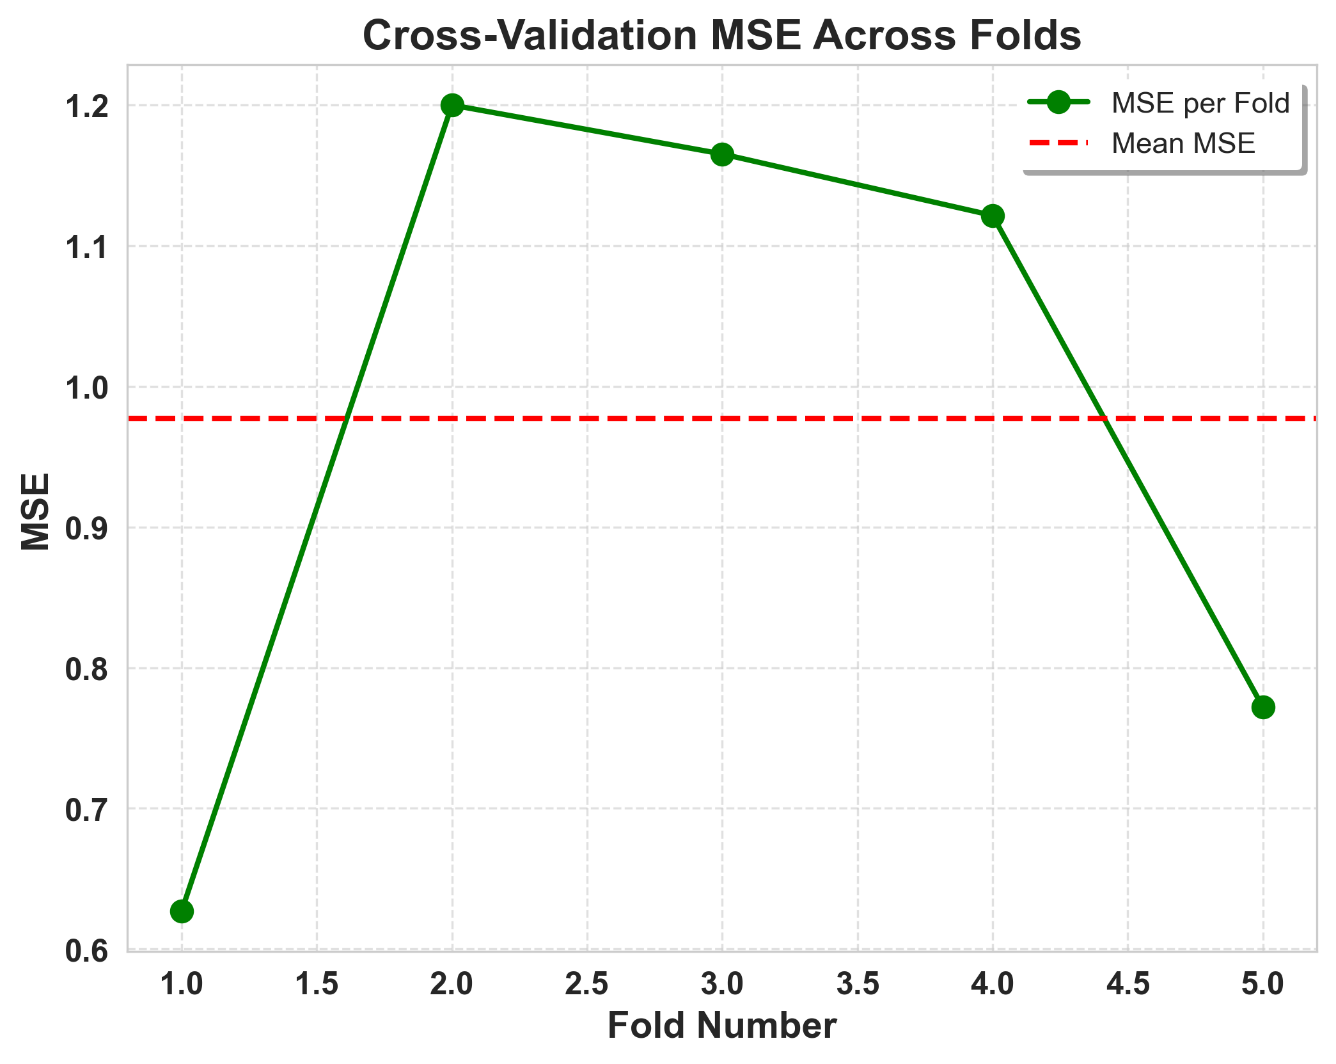


**Fig. S12: MSE values using K-fold Cross Validation**
