# Supplementary material for: Characterization of Natural Therapeutic Compounds Producing Novel Bacterial Strains isolated from Hyderabad, India
Source: Research Square preprint supplement (doi:10.21203/rs.3.rs-4912929/v2), 2025-04-29
Supplement: Supplementary file 3 [file d182b11003b585408ee4ba77.docx]

**Supplementary Material 2**

**Phylogenetic Analysis**

**1. *Klebsiella pneumoniae* strain ABSKSLAB01:**

**Table S1: Maximum Likelihood Estimate of Substitution Matrix**

|  | A | T/U | C | G |
| --- | --- | --- | --- | --- |
| A | - | *3.75* | *4.33* | **13.28** |
| T/U | *4.79* | - | **20.57** | *6.01* |
| C | *4.79* | **17.79** | - | *6.01* |
| G | **10.58** | *3.75* | *4.33* | - |

Each entry is the probability of substitution (*r*) from one base (row) to another base (column). Substitution pattern and rates were estimated under the Tamura-Nei model. Rates of different transitional substitutions are shown in **bold** and those of transversionsal substitutions are shown in *italics*. Relative values of instantaneous *r* were considered during evaluation. For simplicity, sum of *r* values is made equal to 100, The nucleotide frequencies are A = 25.37%, T/U = 19.85%, C = 22.94%, and G = 31.84%. This analysis involved 20 nucleotide sequences. There were a total of 1397 positions in the final dataset.

**Table S2: Maximum Composite Likelihood Estimate of the Pattern of Nucleotide Substitution**

|  | A | T | C | G |
| --- | --- | --- | --- | --- |
| A | - | *4.07* | *4.71* | **13.81** |
| T | *5.21* | - | **18.31** | *6.53* |
| C | *5.21* | **15.85** | - | *6.53* |
| G | **11** | *4.07* | *4.71* | - |

Each entry shows the probability of substitution (r) from one base (row) to another base (column). For simplicity, the sum of r values is made equal to 100. Rates of different transitional substitutions are shown in **bold** and those of transversional substitutions are shown in *italics*. The nucleotide frequencies are 25.38% (A), 19.85% (T/U), 22.93% (C), and 31.85% (G). This analysis involved 20 nucleotide sequences. All ambiguous positions were removed for each sequence pair (pairwise deletion option). There were a total of 1397 positions in the final dataset.


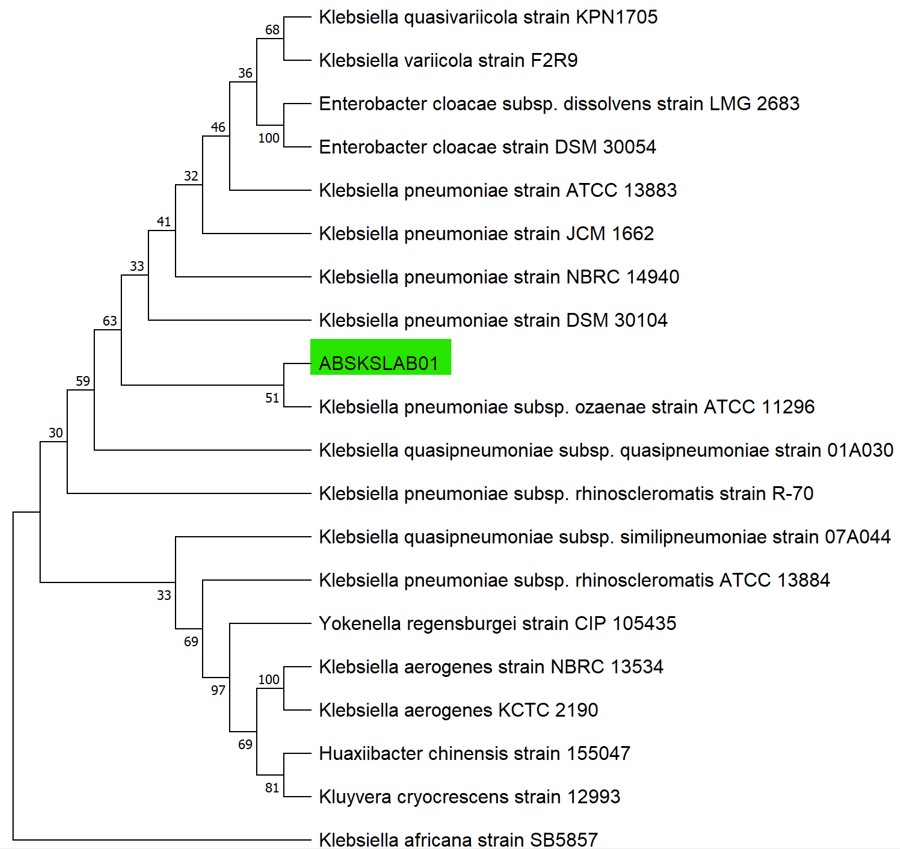


**Fig. S1(a): Phylogenetic Tree for *Klebsiella pneumoniae* strain ABSKSLAB01**


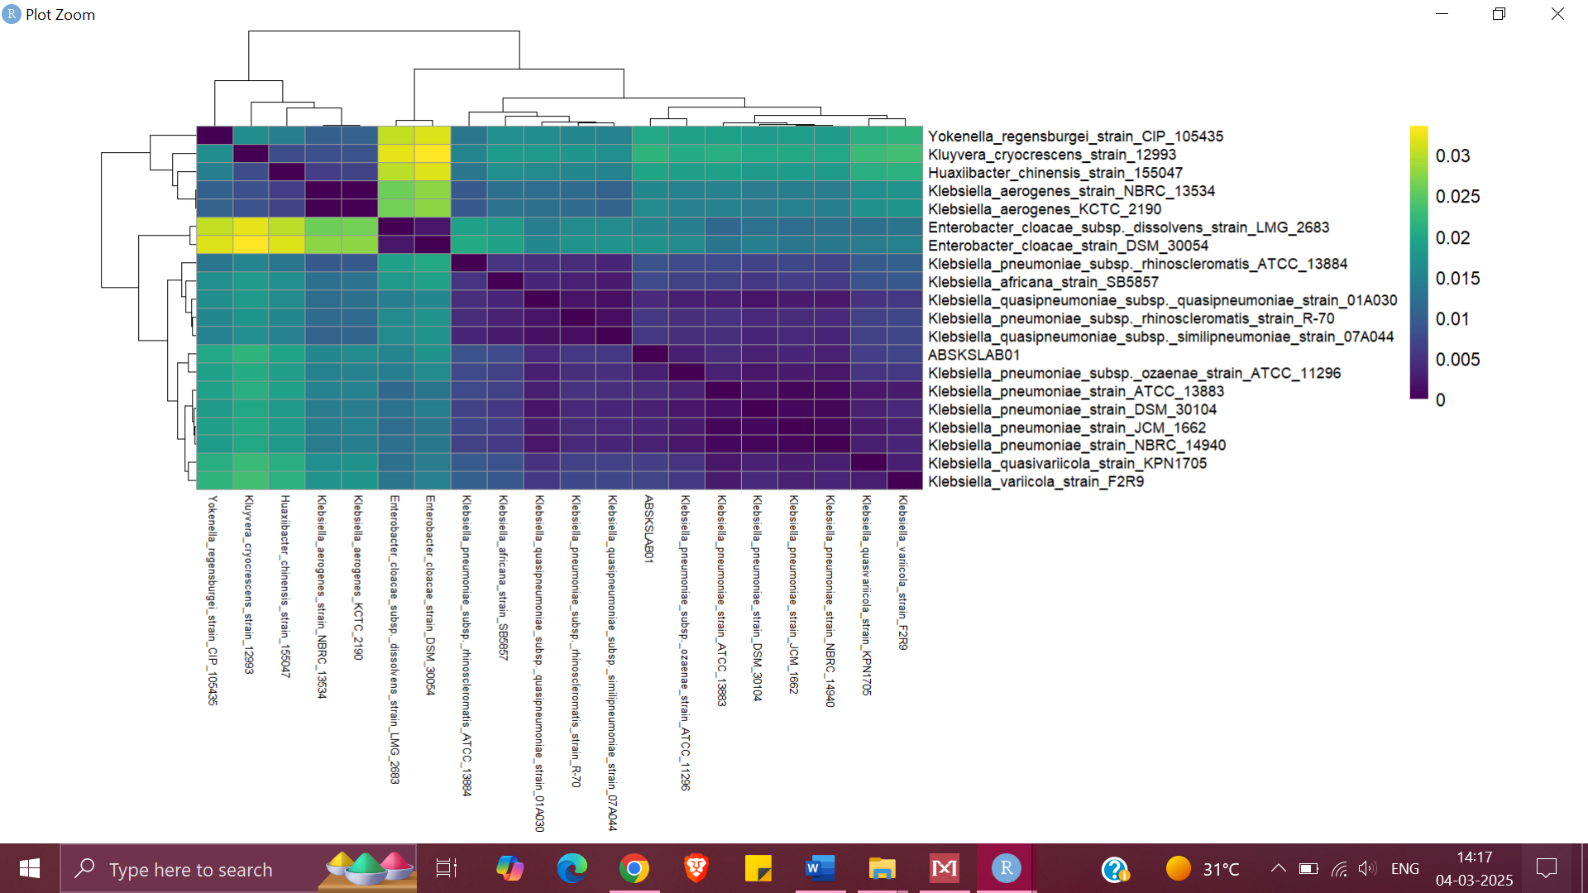


**Fig. S1(b): Phylogenetic Heat Map for *Klebsiella pneumoniae* strain ABSKSLAB01**

**2. *Klebsiella quasipneumoniae* strain ABSKSLAB02:**

**Table S3: Maximum Likelihood Estimate of Substitution Matrix**

|  | A | T/U | C | G |
| --- | --- | --- | --- | --- |
| A | - | *3.97* | *4.53* | **10.92** |
| T/U | *5.05* | - | **21.62** | *6.38* |
| C | *5.05* | **18.95** | - | *6.38* |
| G | **8.65** | *3.97* | *4.53* | - |

The nucleotide frequencies are A = 25.35%, T/U = 19.93%, C = 22.74%, and G = 31.99%. For estimating ML values, a tree topology was automatically computed. This analysis involved 20 nucleotide sequences. There were a total of 1285 positions in the final dataset.

**Table S4: Maximum Composite Likelihood Estimate of the Pattern of Nucleotide Substitution**

|  |  | A | T | C | G |
| --- | --- | --- | --- | --- | --- |
| A |  | - | *4.55* | *5.19* | **12.09** |
| T |  | *5.79* | - | **17.4** | *7.3* |
| C |  | *5.79* | **15.25** | - | *7.3* |
| G |  | **9.58** | *4.55* | *5.19* | - |

The nucleotide frequencies are 25.36% (A), 19.92% (T/U), 22.73% (C), and 31.99% (G). This analysis involved 20 nucleotide sequences. All ambiguous positions were removed for each sequence pair (pairwise deletion option). There were a total of 1285 positions in the final dataset.


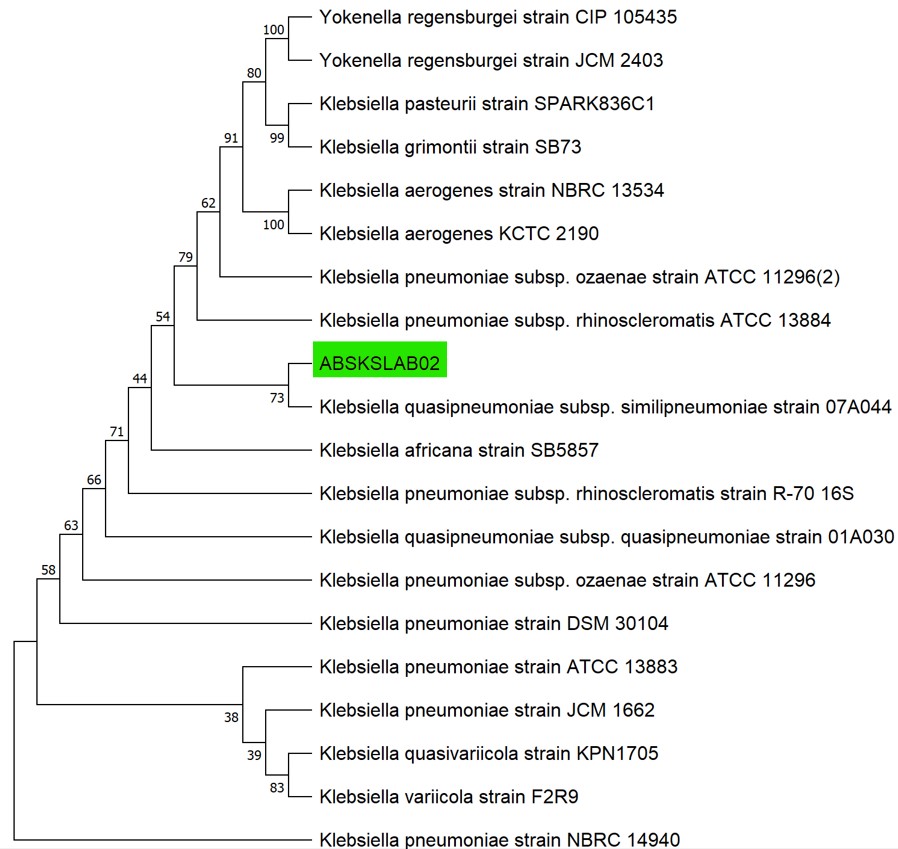


**Fig. S2(a): Phylogenetic Tree for *Klebsiella quasipneumoniae* strain ABSKSLAB02**


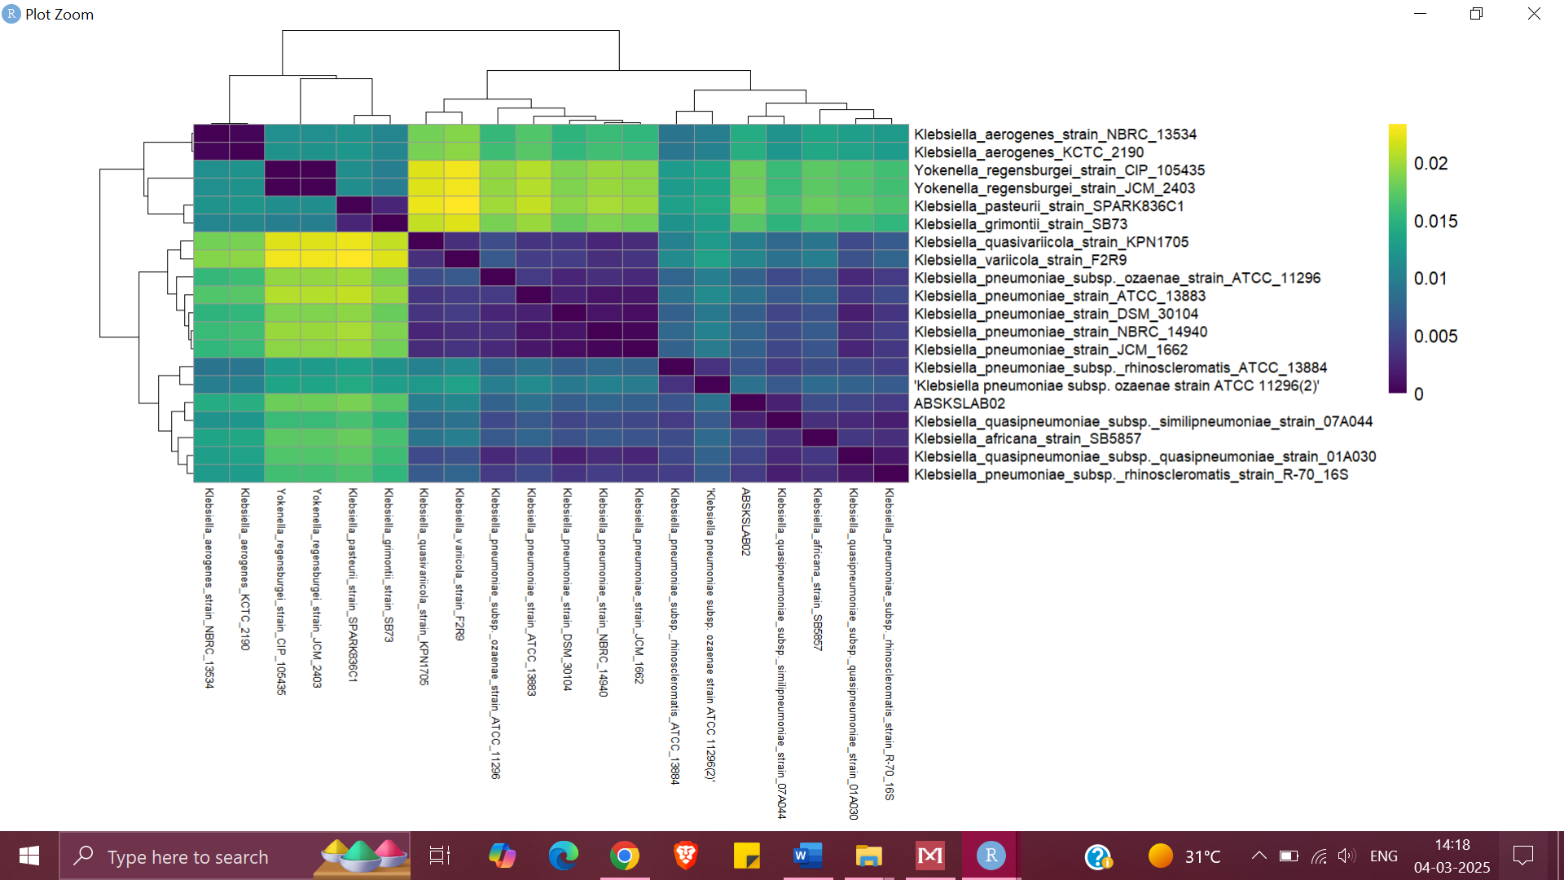


**Fig. S2(b): Phylogenetic Heat Map for *Klebsiella quasipneumoniae* strain ABSKSLAB02**

**3. *Streptomyces minutiscleroticus* strain ABSKSLAB03:**

**Table S5: Maximum Likelihood Estimate of Substitution Matrix**

|  | A | T/U | C | G |
| --- | --- | --- | --- | --- |
| A | - | *5.22* | *7.30* | **14.38** |
| T/U | *6.49* | - | **10.72** | *9.87* |
| C | *6.49* | **7.66** | - | *9.87* |
| G | **9.46** | *5.22* | *7.30* | - |

The nucleotide frequencies are A = 22.47%, T/U = 18.07%, C = 25.28%, and G = 34.17%. For estimating ML values, a tree topology was automatically computed. This analysis involved 20 nucleotide sequences. There were a total of 1025 positions in the final dataset.

**Table S6: Maximum Composite Likelihood Estimate of the Pattern of Nucleotide Substitution**

|  | A | T | C | G |
| --- | --- | --- | --- | --- |
| A | - | *4.73* | *6.62* | **14.78** |
| T | *5.88* | - | **13.51** | *8.95* |
| C | *5.88* | **9.65** | - | *8.95* |
| G | **9.71** | *4.73* | *6.62* | - |

The nucleotide frequencies are 22.47% (A), 18.07% (T/U), 25.28% (C), and 34.17% (G). This analysis involved 20 nucleotide sequences. All ambiguous positions were removed for each sequence pair (pairwise deletion option). There were a total of 1025 positions in the final dataset.


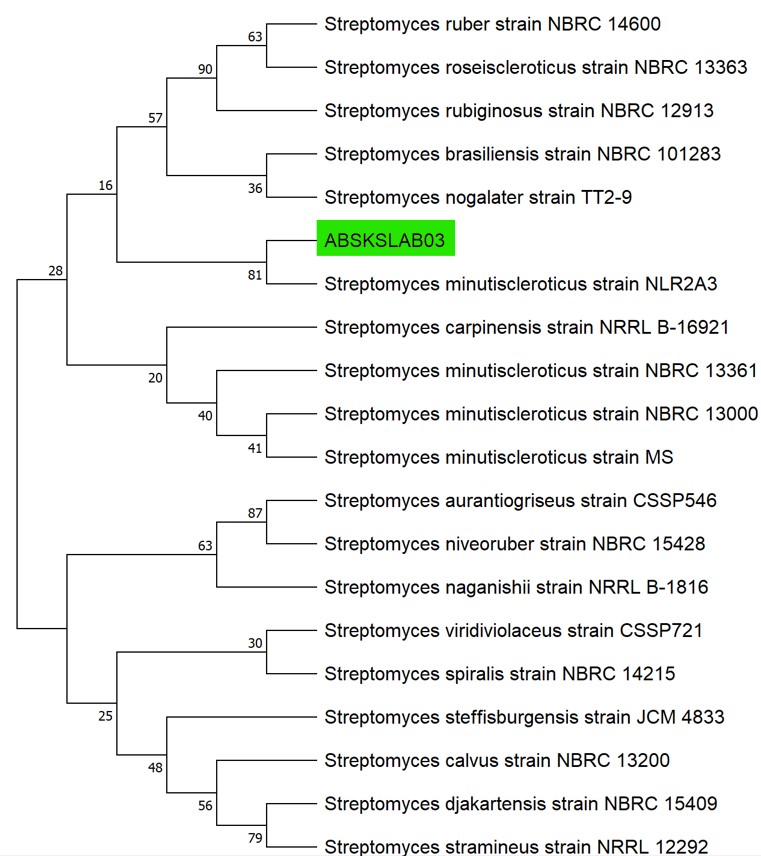


**Fig. S3(a): Phylogenetic Tree for *Streptomyces minutiscleroticus* strain ABSKSLAB03**


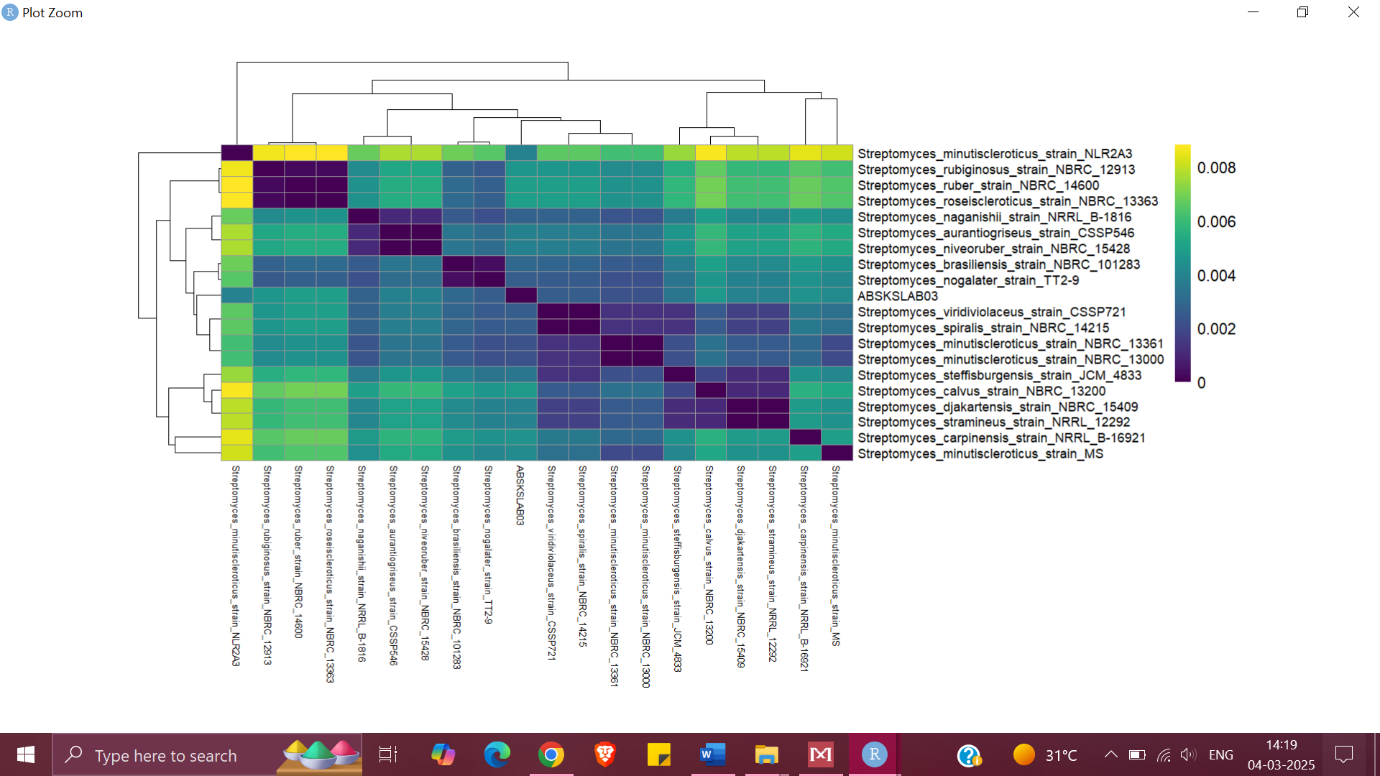


**Fig. S3(b): Phylogenetic Heat Map for *Streptomyces minutiscleroticus* strain ABSKSLAB03**
