# Supplementary material for: Characterization of Natural Therapeutic Compounds Producing Novel Bacterial Strains isolated from Hyderabad, India
Source: Research Square preprint supplement (doi:10.21203/rs.3.rs-4912929/v2), 2025-04-29
Supplement: Supplementary file 4 [file fe2de9bbb779ebbe39909967.docx]

**Supplementary Material 4**

**RNA Structure Prediction using UNAFOLD server**

**Fig. S1(a): 16S rRNA secondary structure of *Klebsiella pneumoniae* strain ABSKSLAB01**

**
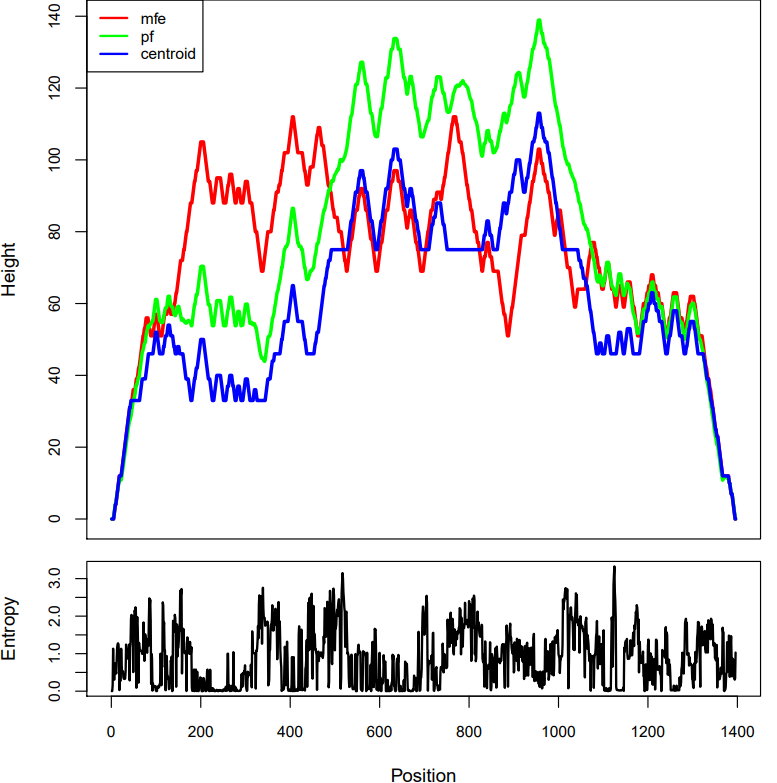
**

**Fig. S1(b): Hill plot representing sequence wise energy and entropy distribution of 16S rRNA for *Klebsiella pneumoniae* strain ABSKSLAB01**

**Fig. S2(a): 16S rRNA secondary structure of *Klebsiella quasipneumoniae* strain ABSKSLAB02**

**
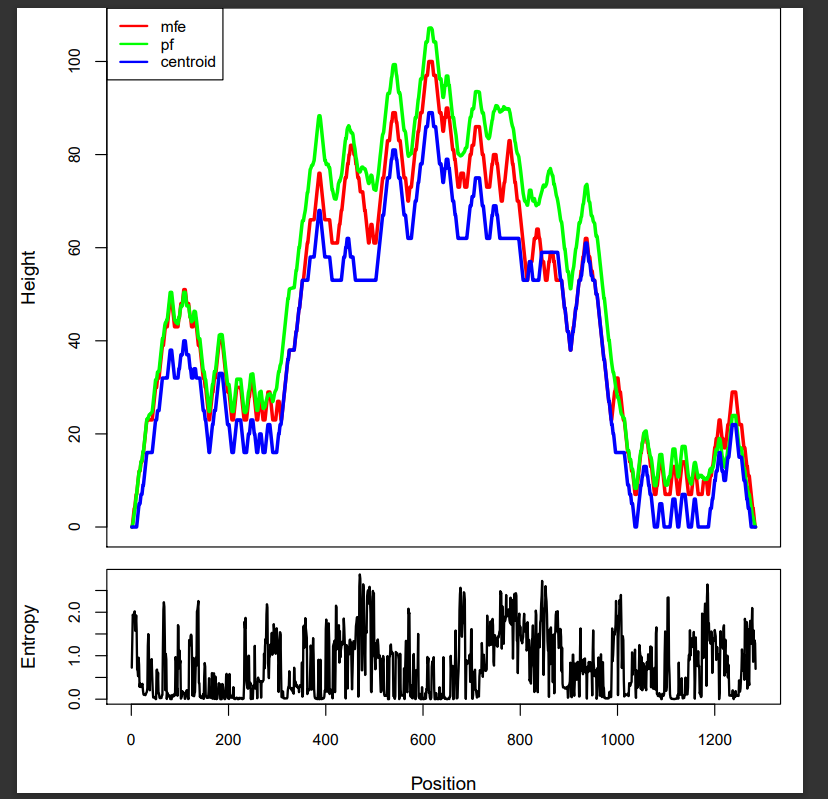
**

**Fig. S2(b): Hill plot representing sequence wise energy and entropy distribution of 16S rRNA for *Klebsiella quasipneumoniae* strain ABSKSLAB02**

**Fig. S3(a): 16S rRNA secondary structure of *Streptomyces minutiscleroticus* strain ABSKSLAB03**

**
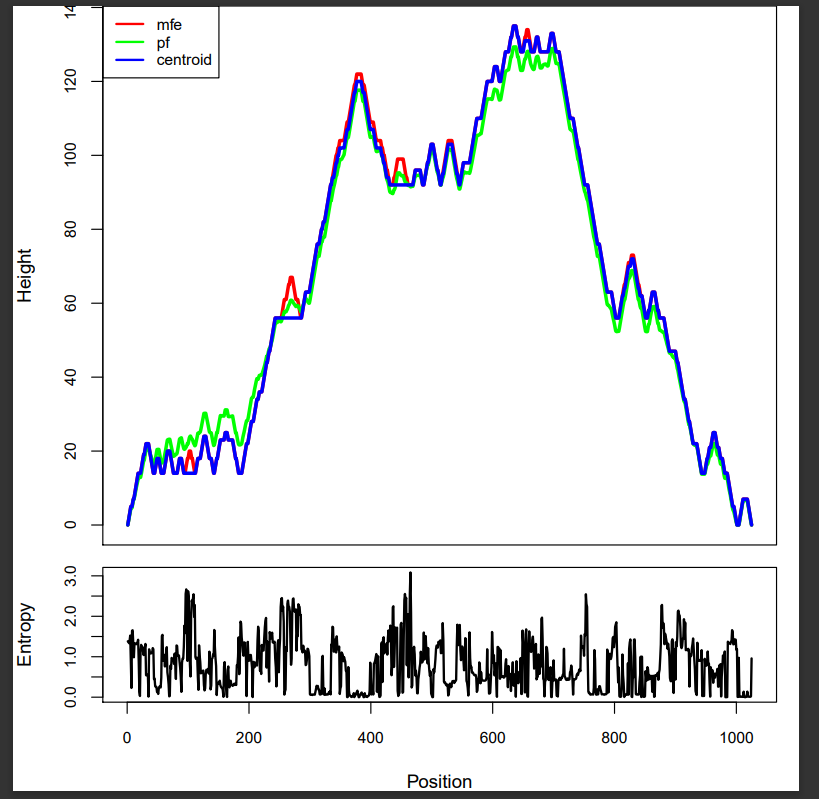
**

**Fig. S3(b): Hill plot representing sequence wise energy and entropy distribution of 16S rRNA for *Streptomyces minutiscleroticus* strain ABSKSLAB03**
